# Supplementary material for: Transcriptome analysis reveals genes associated with wool fineness in merinos
Source: PeerJ. 2023 May 23;11:e15327. doi: 10.7717/peerj.15327 (PMC10215774; doi:10.7717/peerj.15327)
Supplement: Supplemental Information 2 [file peerj-11-15327-s002.xlsx]

## Sheet: Sheet1
Table S1 The wool spinning numbers of 8 Merinos and data quality control of 8 Merino transcriptomes.
Sheep	SampleID	Wool spinning numbers	BaseSum	GC(%)	Q20(%)	Q30(%)	N(%)	GC_separate(%)	GC_fluctuate(%)	GC_diff(%)	SampleID	Total Reads	mapped Reads	Uniq Map	Multiple Map	Only Map Plus Strand	Only Map Minus Strand	randcheck	InsertSizePeak	mappeddiff
Chinese Merino	T03008	66	6291626762	50.72	99.12	93.85	0	1.16	1.08	0.7	T03008	42037180 (100%)	40361233 (96.01%)	39078218 (92.96%)	1283015 (3.05%)	20978979 (49.91%)	21014361 (49.99%)	0.0115	352	1.47
Chinese Merino	T03018	66	6074591484	50.79	99.22	94.57	0	1.18	1.15	0.7	T03018	40615534 (100%)	38792958 (95.51%)	37500228 (92.33%)	1292730 (3.18%)	20235736 (49.82%)	20280519 (49.93%)	0.0116	354	1.47
Chinese Merino	T03097	66	6380186764	51.33	99.09	93.71	0	1.12	1.19	0.7	T03097	42648514 (100%)	40742704 (95.53%)	39335128 (92.23%)	1407576 (3.30%)	21279346 (49.89%)	21343798 (50.05%)	0.0116	353	1.47
Chinese Merino	T03103	66	6220117224	51.13	98.92	92.7	0	1.12	1.28	0.7	T03103	41577074 (100%)	39654201 (95.38%)	38323997 (92.18%)	1330204 (3.20%)	20663431 (49.70%)	20740366 (49.88%)	0.0116	335	1.47
Subo Merino	T03212	80	6078428610	50.8	99.16	94.17	0	1.15	1.13	0.7	T03212	40620724 (100%)	38839842 (95.62%)	37642263 (92.67%)	1197579 (2.95%)	20188629 (49.70%)	20219751 (49.78%)	0.0116	356	1.47
Subo Merino	T03247	80	6219411716	50.89	99.19	94.46	0	1.06	1.11	0.7	T03247	41570998 (100%)	39682200 (95.46%)	38371075 (92.30%)	1311125 (3.15%)	20697905 (49.79%)	20735693 (49.88%)	0.0116	352	1.47
Subo Merino	T03347	80	6135025482	50.63	99.3	95.18	0	1.1	1.1	0.7	T03347	41037662 (100%)	39183386 (95.48%)	37897196 (92.35%)	1286190 (3.13%)	20434880 (49.80%)	20457753 (49.85%)	0.0114	335	1.47
Subo Merino	T03351	100	6441852918	51.01	98.84	92.25	0	1.19	1.28	0.7	T03351	43082524 (100%)	40730529 (94.54%)	39399953 (91.45%)	1330576 (3.09%)	21197438 (49.20%)	21282798 (49.40%)	0.0115	352	1.47
