# Supplementary material for: Transcriptome analysis reveals genes associated with wool fineness in merinos
Source: PeerJ. 2023 May 23;11:e15327. doi: 10.7717/peerj.15327 (PMC10215774; doi:10.7717/peerj.15327)
Supplement: Supplemental Information 3 [file peerj-11-15327-s003.xlsx]

## Sheet: Sheet1
Table S2 The log2FC of all genes.
#ID	Pvalue	log2FC
gene-A1BG	0.0282496	0.79428
gene-A4GALT	0.65901	-0.123459
gene-AAAS	0.800363	-0.0353338
gene-AACS	0.930812	0.0102676
gene-AADACL3	0.674994	-0.163829
gene-AAGAB	0.837002	0.0277014
gene-AAK1	0.914297	0.0134541
gene-AAMDC	0.609292	-0.12126
gene-AAR2	0.690574	-0.0513288
gene-AARD	0.123966	-0.943024
gene-AARS1	0.821181	-0.0270778
gene-AARS2	0.899516	-0.0257681
gene-AASDH	0.344192	0.130975
gene-AASDHPPT	0.605306	-0.0559206
gene-AASS	0.901492	-0.0146221
gene-AATF	0.303879	-0.147363
gene-AATK	0.462733	-0.119695
gene-ABAT	0.986925	-0.00553305
gene-ABCA1	0.909481	0.0140797
gene-ABCA10	0.0564297	0.292602
gene-ABCA12	0.227782	0.141085
gene-ABCA2	0.958828	0.00697764
gene-ABCA3	0.344638	-0.206406
gene-ABCA4	0.111015	0.428394
gene-ABCA5	0.177035	0.162422
gene-ABCA6	0.387952	0.190768
gene-ABCA7	0.479629	0.179691
gene-ABCB1	0.392999	0.192197
gene-ABCB10	0.984609	-0.00232039
gene-ABCB6	0.874261	0.0227417
gene-ABCB7	0.488287	-0.0878125
gene-ABCB8	0.317747	-0.119206
gene-ABCB9	0.814735	0.0418656
gene-ABCC1	0.521757	0.0729604
gene-ABCC10	0.164962	0.243252
gene-ABCC11	0.0103597	-0.526453
gene-ABCC3	0.602355	0.0765701
gene-ABCC5	0.156943	0.194006
gene-ABCC6	0.601116	-0.247515
gene-ABCC8	0.735215	0.158462
gene-ABCC9	0.328006	0.188352
gene-ABCD1	0.450348	-0.115745
gene-ABCD3	0.790927	0.0298568
gene-ABCD4	0.0887464	0.295642
gene-ABCE1	0.404263	-0.0930891
gene-ABCF1	0.195528	-0.174951
gene-ABCF3	0.796515	-0.0283607
gene-ABCG1	0.304555	0.12674
gene-ABCG2	0.0880993	0.267927
gene-ABHD10	0.792643	-0.0444401
gene-ABHD11	0.472776	-0.132114
gene-ABHD12	0.868788	0.0174171
gene-ABHD12B	0.354927	0.297582
gene-ABHD13	0.989841	-0.00166422
gene-ABHD14A	0.667896	0.117235
gene-ABHD14B	0.759871	-0.0519118
gene-ABHD15	0.695498	-0.118893
gene-ABHD16A	0.947859	-0.00864461
gene-ABHD16B	0.493209	0.180427
gene-ABHD17A	0.471495	-0.0795057
gene-ABHD17B	0.993839	-0.00133418
gene-ABHD17C	0.493444	0.0838956
gene-ABHD18	0.338806	0.183227
gene-ABHD2	0.627894	-0.0573686
gene-ABHD3	0.133623	-0.217157
gene-ABHD4	0.499374	-0.0876448
gene-ABHD5	0.48163	-0.0992225
gene-ABHD6	0.409586	-0.145653
gene-ABHD8	0.659971	-0.0847169
gene-ABI1	0.932545	-0.00914174
gene-ABI2	0.946474	-0.0114389
gene-ABI3	0.220298	-0.399995
gene-ABITRAM	0.811103	-0.0309491
gene-ABL1	0.833104	-0.0228278
gene-ABL2	0.945666	0.0110201
gene-ABLIM1	0.0445366	0.291471
gene-ABLIM2	0.916011	-0.0304542
gene-ABLIM3	0.259822	0.182907
gene-ABR	0.726494	0.0391231
gene-ABRACL	0.385569	-0.109198
gene-ABRAXAS1	0.88735	-0.0189294
gene-ABRAXAS2	0.733754	-0.0432252
gene-ABT1	0.722744	-0.0422
gene-ABTB2	0.693771	-0.0566257
gene-ACAA1	0.947726	-0.00790034
gene-ACAA2	0.293939	-0.159504
gene-ACACA	0.526707	-0.08556
gene-ACACB	0.428387	-0.228956
gene-ACAD10	0.95989	0.00742171
gene-ACAD11	0.633448	0.0598465
gene-ACAD8	0.301388	0.130046
gene-ACAD9	0.32863	0.143694
gene-ACADL	0.701135	0.0650339
gene-ACADM	0.974611	-0.00390558
gene-ACADS	0.949969	-0.0122967
gene-ACADSB	0.872903	-0.0371232
gene-ACADVL	0.892039	-0.0149058
gene-ACAP1	0.262153	0.160654
gene-ACAP2	0.532241	0.0685809
gene-ACAP3	0.341469	0.134466
gene-ACAT1	0.580953	0.0651253
gene-ACAT2	0.774522	0.0401839
gene-ACBD3	0.903222	-0.0128567
gene-ACBD4	0.846124	-0.0429136
gene-ACBD5	0.0642372	-0.225606
gene-ACBD6	0.651431	0.0626942
gene-ACCS	0.615938	0.122976
gene-ACD	0.655757	0.0759786
gene-ACE	0.818745	-0.0602931
gene-ACE2	0.0626231	0.602947
gene-ACER1	0.894144	0.020659
gene-ACER2	0.586228	0.0896791
gene-ACER3	0.472879	-0.0898165
gene-ACHE	0.768117	0.0944918
gene-ACIN1	0.158019	0.155295
gene-ACKR1	0.414229	-0.271939
gene-ACKR2	0.822658	0.0528732
gene-ACKR3	0.00604911	-0.427279
gene-ACKR4	0.405012	0.302893
gene-ACLY	0.878176	0.0169181
gene-ACO1	0.380961	-0.1086
gene-ACO2	0.889883	0.0159459
gene-ACOT11	0.42693	-0.248675
gene-ACOT6	0.430704	-0.271388
gene-ACOT7	0.677382	0.050601
gene-ACOT8	0.597343	-0.0854725
gene-ACOT9	0.0392539	-0.278181
gene-ACOX1	0.879576	-0.0164263
gene-ACOX3	0.244608	0.147678
gene-ACP1	0.327773	-0.10379
gene-ACP2	0.646206	-0.0512451
gene-ACP3	0.315539	-0.131346
gene-ACP5	0.90274	-0.0171768
gene-ACP6	0.360747	0.137154
gene-ACP7	0.223476	0.293539
gene-ACSBG1	0.00413901	0.336283
gene-ACSF2	0.785904	-0.0428837
gene-ACSF3	0.987989	0.00366322
gene-ACSL1	0.623455	-0.0595639
gene-ACSL3	0.597889	-0.0554945
gene-ACSL4	0.480058	0.081611
gene-ACSL5	0.918457	-0.0142277
gene-ACSL6	0.332395	0.242227
gene-ACSM1	0.41469	-0.309234
gene-ACSM3	0.00645706	0.37219
gene-ACSM5	0.765879	0.119773
gene-ACSS1	0.522023	0.0772947
gene-ACSS2	0.162297	0.165615
gene-ACSS3	0.440644	0.0910814
gene-ACTA2	0.0190972	-0.344605
gene-ACTB	0.366034	-0.110341
gene-ACTBL2	0.424154	0.197099
gene-ACTC1	0.0182267	-1.01022
gene-ACTG1	0.127876	-0.178103
gene-ACTG2	0.0798251	-0.23826
gene-ACTL6A	0.413264	-0.0945494
gene-ACTN1	0.166084	-0.184485
gene-ACTN2	0.506215	0.207698
gene-ACTN3	0.0313427	-1.00335
gene-ACTN4	0.997652	0.000373897
gene-ACTR10	0.442158	0.0822666
gene-ACTR1A	0.606572	-0.054776
gene-ACTR1B	0.394966	0.100594
gene-ACTR2	0.526257	-0.0670655
gene-ACTR3	0.71865	-0.0405014
gene-ACTR3B	0.852522	0.0397687
gene-ACTR5	0.820745	0.0331155
gene-ACTR6	0.79685	-0.0430082
gene-ACTR8	0.840958	0.0268406
gene-ACVR1	0.29756	0.117495
gene-ACVR1B	0.953442	-0.00668888
gene-ACVR2A	0.68349	0.0497319
gene-ACVR2B	0.792962	0.0388354
gene-ACVRL1	0.564069	-0.0937138
gene-ACY1	0.127368	-0.270968
gene-ACYP1	0.970042	-0.0167533
gene-ACYP2	0.858116	0.0572484
gene-ADA	0.639731	-0.130112
gene-ADA2	0.247961	-0.433672
gene-ADAL	0.580244	0.0787033
gene-ADAM10	0.591955	-0.0570421
gene-ADAM11	0.0750856	-0.674698
gene-ADAM12	0.908281	-0.0221163
gene-ADAM15	0.490691	0.0774676
gene-ADAM17	0.366397	-0.0982128
gene-ADAM19	0.291687	-0.196805
gene-ADAM22	0.498433	0.248428
gene-ADAM23	0.969879	-0.0168188
gene-ADAM33	0.000370862	0.555151
gene-ADAM8	0.895774	0.0546821
gene-ADAM9	0.602356	0.0660471
gene-ADAMTS1	0.386276	-0.131743
gene-ADAMTS10	0.0900997	0.292288
gene-ADAMTS12	0.426261	-0.139206
gene-ADAMTS14	0.149841	0.567801
gene-ADAMTS15	0.893841	-0.0313532
gene-ADAMTS16	0.557012	-0.240249
gene-ADAMTS17	0.414597	0.118993
gene-ADAMTS18	0.930745	-0.0165457
gene-ADAMTS19	0.248669	-0.294437
gene-ADAMTS2	0.142701	-0.362931
gene-ADAMTS20	0.40503	0.343302
gene-ADAMTS3	0.565383	-0.249547
gene-ADAMTS4	0.599374	-0.206331
gene-ADAMTS5	0.259387	0.204049
gene-ADAMTS6	0.993809	0.00469872
gene-ADAMTS7	0.880401	-0.0436394
gene-ADAMTS8	0.393171	0.265522
gene-ADAMTS9	0.768955	-0.0542829
gene-ADAMTSL1	0.738463	0.0954266
gene-ADAMTSL2	0.695656	0.0686079
gene-ADAMTSL3	0.666102	0.070118
gene-ADAMTSL4	0.855306	-0.0351663
gene-ADAMTSL5	0.840092	0.0367413
gene-ADAP1	0.865952	-0.0311502
gene-ADAP2	0.699044	0.085912
gene-ADAR	0.501099	-0.0705969
gene-ADARB1	0.422786	0.0933072
gene-ADAT1	0.274616	0.247679
gene-ADAT2	0.248534	0.240138
gene-ADAT3	0.585704	0.248476
gene-ADCK1	0.162227	0.357283
gene-ADCK2	0.818061	0.032493
gene-ADCK5	0.00667225	0.350815
gene-ADCY1	0.00495996	0.863947
gene-ADCY2	0.737868	0.0892941
gene-ADCY3	0.949917	-0.00941662
gene-ADCY4	0.202702	0.227093
gene-ADCY5	0.642341	0.138587
gene-ADCY6	0.744787	0.0378809
gene-ADCY7	0.501384	0.0743428
gene-ADCY9	0.982337	-0.00411837
gene-ADCYAP1R1	0.0893503	0.448929
gene-ADD1	0.576955	0.0587834
gene-ADD2	0.198764	-0.595337
gene-ADD3	0.920745	-0.0111225
gene-ADGRA2	0.890185	0.016485
gene-ADGRA3	0.914305	-0.0131177
gene-ADGRB1	0.0107431	1.16976
gene-ADGRB2	0.963905	-0.0111217
gene-ADGRD1	0.626488	0.0933444
gene-ADGRE3	0.854742	-0.086657
gene-ADGRE5	0.717558	-0.0768576
gene-ADGRF2	0.936043	-0.0138733
gene-ADGRF4	0.629163	0.0574817
gene-ADGRF5	0.233804	0.159958
gene-ADGRG1	0.590141	0.0661008
gene-ADGRG2	0.991049	0.00417457
gene-ADGRG6	0.688058	-0.044636
gene-ADGRL1	0.00267099	0.391823
gene-ADGRL2	0.984415	-0.0021319
gene-ADGRL3	0.832914	-0.027176
gene-ADGRL4	0.560376	-0.127802
gene-ADGRV1	0.403553	0.235164
gene-ADH1C	0.976751	0.0167564
gene-ADHFE1	0.148874	0.392685
gene-ADI1	0.366943	-0.113442
gene-ADIG	0.113146	0.458147
gene-ADIPOQ	0.0600524	-1.30275
gene-ADIPOR1	0.851207	-0.0208073
gene-ADIPOR2	0.989159	-0.00194012
gene-ADIRF	0.6288	0.133246
gene-ADK	0.332215	-0.100574
gene-ADM	0.503016	-0.138812
gene-ADM2	0.871213	0.0387742
gene-ADNP2	0.99247	0.00130393
gene-ADO	0.334723	0.119032
gene-ADORA1	0.658282	0.167861
gene-ADORA2B	0.447614	-0.140893
gene-ADORA3	0.374249	-0.328925
gene-ADPGK	0.723861	-0.0449438
gene-ADPRH	0.229775	-0.296353
gene-ADPRM	0.835952	0.0281042
gene-ADPRS	0.614605	-0.0692552
gene-ADRA1A	0.640029	0.127873
gene-ADRA1B	0.516988	0.243192
gene-ADRA1D	0.59456	0.189311
gene-ADRA2A	0.0644243	0.425872
gene-ADRA2B	0.747897	-0.0948587
gene-ADRA2C	0.155624	-0.549966
gene-ADRB1	0.868348	0.0401216
gene-ADRB2	0.344854	-0.310759
gene-ADRM1	0.376995	-0.0946377
gene-ADSL	0.822482	-0.0284587
gene-ADSS1	0.58673	-0.10075
gene-ADSS2	0.850846	-0.0226549
gene-AEBP1	0.0141788	-0.40699
gene-AEBP2	0.981349	-0.00256652
gene-AEN	0.944884	-0.00962963
gene-AFAP1	0.758899	0.0431032
gene-AFAP1L1	0.982621	-0.00756301
gene-AFAP1L2	0.545148	-0.0877676
gene-AFDN	0.279715	0.134453
gene-AFF1	0.593886	-0.0596094
gene-AFF2	0.0832699	-0.592567
gene-AFF3	0.755755	-0.0647589
gene-AFF4	0.964191	-0.00499146
gene-AFG1L	0.464815	0.193184
gene-AFG3L2	0.755224	0.0326433
gene-AFMID	0.930885	0.0336495
gene-AFTPH	0.952047	0.00691607
gene-AGA	0.39782	0.169611
gene-AGAP1	0.957862	-0.0061701
gene-AGAP2	0.619641	-0.0965721
gene-AGAP3	0.658458	0.0456206
gene-AGBL2	0.740645	0.114084
gene-AGBL5	0.412139	0.145953
gene-AGFG1	0.341594	0.101535
gene-AGFG2	0.350705	-0.120918
gene-AGGF1	0.875673	-0.0170097
gene-AGK	0.0693207	0.273106
gene-AGL	0.690229	0.055599
gene-AGMO	0.387604	-0.274402
gene-AGO2	0.40554	0.0992782
gene-AGO3	0.540801	0.0699437
gene-AGO4	0.955192	-0.00669922
gene-AGPAT1	0.341798	0.116787
gene-AGPAT2	0.446809	-0.0818547
gene-AGPAT3	0.167993	0.184974
gene-AGPAT4	0.168088	-0.489559
gene-AGPAT5	0.791917	-0.0309561
gene-AGPS	0.937014	-0.00948277
gene-AGRN	0.816149	-0.0274885
gene-AGT	0.806232	0.117251
gene-AGTPBP1	0.351104	-0.135483
gene-AGTR1	0.170273	-0.308958
gene-AHCTF1	0.848603	0.021755
gene-AHCY	0.000312323	-0.556201
gene-AHCYL1	0.46693	-0.081126
gene-AHCYL2	0.109402	-0.213689
gene-AHDC1	0.334589	0.119358
gene-AHI1	0.679866	-0.0650099
gene-AHNAK	0.777035	0.0317611
gene-AHNAK2	0.653859	0.0637742
gene-AHR	0.509311	0.112571
gene-AHRR	0.212028	0.460832
gene-AHSA1	0.188777	-0.146426
gene-AHSA2P	0.620222	-0.0989943
gene-AHSG	0.21858	0.430849
gene-AIDA	0.258917	-0.132021
gene-AIF1	0.688005	-0.142679
gene-AIF1L	0.65445	-0.0898643
gene-AIFM1	0.280684	-0.159139
gene-AIFM2	0.399151	-0.219912
gene-AIG1	0.842758	0.0347837
gene-AIMP1	0.665837	-0.0519737
gene-AIMP2	0.13983	-0.184994
gene-AJUBA	0.24359	0.132787
gene-AK1	0.485568	-0.182726
gene-AK2	0.632175	-0.0545142
gene-AK3	0.960478	0.00730327
gene-AK4	0.17269	-0.212345
gene-AK6	0.91165	-0.0272979
gene-AK8	0.42293	-0.255195
gene-AKAP1	0.608216	-0.0550987
gene-AKAP10	0.643945	-0.0550398
gene-AKAP11	0.483633	-0.0773351
gene-AKAP12	0.260102	-0.174377
gene-AKAP13	0.559203	0.0628239
gene-AKAP17A	0.772939	0.0405212
gene-AKAP4	0.564321	0.198273
gene-AKAP5	0.106605	0.462067
gene-AKAP6	0.412584	-0.26204
gene-AKAP7	0.616222	-0.140342
gene-AKAP8	0.129914	0.165216
gene-AKAP8L	0.0930854	0.205089
gene-AKAP9	0.988705	0.00166034
gene-AKIP1	0.327034	0.228108
gene-AKIRIN1	0.922364	-0.0136077
gene-AKIRIN2	0.280073	-0.143771
gene-AKNA	0.499657	0.148046
gene-AKR1A1	0.568455	-0.0688425
gene-AKR1B1	0.439037	-0.183244
gene-AKR1E2	0.0816004	0.370757
gene-AKR7A2	0.183696	-0.162622
gene-AKT1	0.939057	0.00885917
gene-AKT1S1	0.870449	-0.0229462
gene-AKT2	0.960352	-0.00549581
gene-AKT3	0.902332	-0.013966
gene-ALAD	0.921934	0.015152
gene-ALAS1	0.524925	-0.087756
gene-ALB	0.709006	-0.200017
gene-ALCAM	0.350604	0.114713
gene-ALDH16A1	0.858456	0.0244074
gene-ALDH18A1	0.0240729	-0.274
gene-ALDH1A1	0.0158475	-0.445243
gene-ALDH1A2	0.187478	-0.539485
gene-ALDH1A3	0.611143	0.0568739
gene-ALDH1L2	0.779309	0.0536121
gene-ALDH2	0.572306	-0.0644966
gene-ALDH3A2	0.27906	-0.137724
gene-ALDH3B1	0.96186	-0.0148016
gene-ALDH4A1	0.169276	-0.19575
gene-ALDH5A1	0.391159	0.11118
gene-ALDH6A1	0.818223	-0.0250333
gene-ALDH7A1	0.366629	-0.107364
gene-ALDH9A1	0.997631	-0.000553407
gene-ALDOA	0.392805	-0.102093
gene-ALDOC	0.508253	-0.164357
gene-ALG1	0.9034	-0.019673
gene-ALG11	0.397014	-0.108137
gene-ALG12	0.931331	-0.0116312
gene-ALG13	0.604816	0.0801189
gene-ALG14	0.63123	-0.0724298
gene-ALG2	0.836055	0.037907
gene-ALG3	0.398884	-0.169726
gene-ALG5	0.809134	-0.0366701
gene-ALG6	0.119542	0.280387
gene-ALG8	0.856616	0.0371971
gene-ALG9	0.862827	-0.0224737
gene-ALK	0.450064	-0.257228
gene-ALKBH1	0.758044	0.0552307
gene-ALKBH2	0.909374	-0.032204
gene-ALKBH3	0.610594	-0.0888237
gene-ALKBH4	0.772374	-0.0490216
gene-ALKBH5	0.982433	-0.00249989
gene-ALKBH6	0.699322	-0.0913958
gene-ALKBH7	0.648064	0.096558
gene-ALKBH8	0.605743	0.105055
gene-ALMS1	0.181439	0.169833
gene-ALOX12	0.528151	-0.0993557
gene-ALOX12B	0.0938632	0.499917
gene-ALOX15	0.889646	-0.0723378
gene-ALOX5	0.782369	-0.0893839
gene-ALOXE3	0.804424	0.0507952
gene-ALPK1	0.0750132	0.357386
gene-ALPK2	0.10784	-0.58823
gene-ALPK3	0.660747	0.116421
gene-ALPL	0.609847	-0.167086
gene-ALS2	0.698842	-0.0412979
gene-ALS2CL	0.0249526	0.380658
gene-ALX3	0.978166	0.00975886
gene-ALX4	0.735668	0.0866333
gene-ALYREF	0.927939	0.0101523
gene-AMACR	0.907355	-0.0254413
gene-AMBN	0.463713	-0.140601
gene-AMBRA1	0.888247	-0.0162708
gene-AMD1	0.200579	-0.143146
gene-AMDHD1	0.208786	0.506953
gene-AMDHD2	0.715797	-0.048147
gene-AMER1	0.312188	0.143318
gene-AMER2	0.0613724	0.686211
gene-AMFR	0.782072	0.0293806
gene-AMHR2	0.524388	0.39776
gene-AMIGO1	0.648193	-0.0780311
gene-AMIGO2	0.882065	-0.0263103
gene-AMIGO3	0.277877	-0.352453
gene-AMMECR1	0.317093	-0.122425
gene-AMMECR1L	0.763933	0.0371724
gene-AMN1	0.885163	0.0312668
gene-AMOT	0.783657	-0.0324654
gene-AMOTL1	0.261698	0.126466
gene-AMOTL2	0.814586	0.0284884
gene-AMPD2	0.810732	0.0314993
gene-AMPD3	0.178978	0.323968
gene-AMT	0.763075	0.047922
gene-AMZ1	0.984424	0.0166486
gene-AMZ2	0.909899	0.0248908
gene-ANAPC1	0.922272	0.0110855
gene-ANAPC10	0.594042	-0.117465
gene-ANAPC11	0.382547	-0.121817
gene-ANAPC13	0.916339	-0.0205891
gene-ANAPC15	0.703491	-0.0639622
gene-ANAPC16	0.755933	0.0388869
gene-ANAPC2	0.772722	0.0338166
gene-ANAPC4	0.847318	0.0231933
gene-ANAPC5	0.957818	0.00685962
gene-ANAPC7	0.8722	-0.0175399
gene-ANGEL1	0.578256	0.104385
gene-ANGEL2	0.253507	0.13398
gene-ANGPT1	0.478937	-0.21185
gene-ANGPT2	0.0760941	-0.540489
gene-ANGPT4	0.265611	-0.208323
gene-ANGPTL1	0.248034	-0.281437
gene-ANGPTL2	0.418062	0.120801
gene-ANGPTL4	0.437286	-0.122967
gene-ANGPTL5	0.368136	-0.334065
gene-ANGPTL6	0.61858	0.151468
gene-ANK1	0.687222	0.177998
gene-ANK2	0.473459	-0.116261
gene-ANK3	0.384317	-0.109194
gene-ANKFY1	0.63919	0.0492753
gene-ANKH	0.639683	-0.0517806
gene-ANKIB1	0.689077	0.0424619
gene-ANKLE1	0.308564	0.297414
gene-ANKLE2	0.921834	0.0106527
gene-ANKMY2	0.430654	-0.0944354
gene-ANKRA2	0.69567	0.0636175
gene-ANKRD10	0.335064	0.14109
gene-ANKRD11	0.264135	0.134217
gene-ANKRD12	0.218349	0.138293
gene-ANKRD13A	0.248402	-0.128582
gene-ANKRD13B	0.740823	-0.0573367
gene-ANKRD13C	0.772441	-0.0337201
gene-ANKRD13D	0.244116	0.191152
gene-ANKRD16	0.927071	-0.0146951
gene-ANKRD17	0.604418	-0.0564527
gene-ANKRD22	0.716152	-0.0616929
gene-ANKRD23	0.610646	0.153088
gene-ANKRD24	0.465234	-0.256212
gene-ANKRD27	0.438958	0.0808041
gene-ANKRD28	0.871987	0.01829
gene-ANKRD29	0.232694	-0.277191
gene-ANKRD33	0.406051	0.305051
gene-ANKRD33B	0.474815	-0.124075
gene-ANKRD35	0.203383	0.163434
gene-ANKRD37	0.554246	0.256394
gene-ANKRD39	0.95988	-0.00957583
gene-ANKRD40	0.402543	0.0914181
gene-ANKRD42	0.026162	0.287841
gene-ANKRD44	0.145325	0.256127
gene-ANKRD45	0.162467	-0.394054
gene-ANKRD46	0.835148	-0.0255721
gene-ANKRD49	0.752584	0.0486648
gene-ANKRD50	0.792052	-0.0302055
gene-ANKRD52	0.365495	0.108186
gene-ANKRD54	0.502234	0.0885256
gene-ANKRD6	0.768284	0.0745856
gene-ANKRD61	0.0971911	0.637171
gene-ANKRD63	0.0873026	0.591073
gene-ANKRD7	0.359884	0.325686
gene-ANKRD9	0.0309284	-0.4065
gene-ANKS1A	0.368023	0.100532
gene-ANKS3	0.859701	0.0304116
gene-ANKS6	0.311089	-0.307022
gene-ANKZF1	0.0275811	0.321337
gene-ANLN	0.378853	-0.0927511
gene-ANO1	0.223769	-0.29887
gene-ANO10	0.365486	-0.105809
gene-ANO3	0.920534	-0.0155386
gene-ANO6	0.653058	-0.0577243
gene-ANO8	0.125434	0.242972
gene-ANO9	0.332026	0.153863
gene-ANOS1	0.0855895	-0.344793
gene-ANP32A	0.961657	0.00562503
gene-ANP32B	0.222873	-0.130461
gene-ANP32E	0.986283	-0.00198337
gene-ANTKMT	0.182529	0.210421
gene-ANTXR1	0.778092	-0.039435
gene-ANTXR2	0.749358	-0.0608911
gene-ANXA1	0.892975	-0.0152218
gene-ANXA11	0.677227	0.0501129
gene-ANXA2	0.0830484	-0.207171
gene-ANXA3	0.045341	-0.306056
gene-ANXA4	0.159021	-0.152683
gene-ANXA5	0.0797704	-0.237342
gene-ANXA6	0.0316953	-0.330027
gene-ANXA7	0.913873	-0.0135996
gene-ANXA9	0.617406	-0.0833343
gene-AOAH	0.0405752	-0.708678
gene-AOC1	0.0525795	-0.65848
gene-AOC2	0.330671	-0.135642
gene-AOC3	0.56514	-0.081137
gene-AOPEP	0.678583	0.0485937
gene-AOX1	0.490923	0.118708
gene-AP1AR	0.662464	-0.0497601
gene-AP1B1	0.477864	-0.0848929
gene-AP1G1	0.923411	-0.0102191
gene-AP1G2	0.244956	0.168911
gene-AP1M1	0.836315	-0.0231156
gene-AP1M2	0.0923783	-0.189503
gene-AP1S1	0.497746	-0.0809832
gene-AP1S2	0.262035	-0.151024
gene-AP1S3	0.762926	-0.0692147
gene-AP2A1	0.984725	-0.00210424
gene-AP2A2	0.971347	0.00423329
gene-AP2B1	0.343466	-0.102313
gene-AP2M1	0.178045	-0.14763
gene-AP2S1	0.872257	-0.0191229
gene-AP3B1	0.207905	-0.132785
gene-AP3D1	0.771257	-0.0310822
gene-AP3M1	0.913493	-0.0117464
gene-AP3M2	0.464801	0.275815
gene-AP3S1	0.812153	0.0315954
gene-AP4B1	0.28695	0.144098
gene-AP4E1	0.437861	0.0934113
gene-AP4M1	0.861875	0.0226083
gene-AP4S1	0.910723	0.0203442
gene-AP5B1	0.461283	0.112829
gene-AP5M1	0.36157	0.100008
gene-AP5S1	0.926262	-0.0190006
gene-AP5Z1	0.999075	-0.000326794
gene-APAF1	0.905639	-0.0153507
gene-APBA1	0.640655	-0.0905883
gene-APBA2	0.384815	-0.254087
gene-APBA3	0.974565	-0.00502846
gene-APBB1	0.984214	-0.0029826
gene-APBB2	0.786117	-0.0287095
gene-APBB3	0.0672934	0.354161
gene-APC	0.453913	0.0849345
gene-APC2	0.924637	-0.0164423
gene-APCDD1	0.377625	-0.116888
gene-APCDD1L	0.0420237	0.272852
gene-APEH	0.864097	-0.0198047
gene-APEX1	0.771654	-0.0313646
gene-APEX2	0.882113	-0.021346
gene-APH1A	0.603687	-0.0579718
gene-APH1B	0.44321	-0.14766
gene-API5	0.821692	-0.0247621
gene-APLF	0.638985	-0.102193
gene-APLNR	0.462601	-0.178775
gene-APLP1	0.438655	0.144794
gene-APLP2	0.879844	-0.0165236
gene-APOA1	0.470186	-0.189446
gene-APOBEC2	0.749021	0.0857517
gene-APOBEC3F	0.973866	-0.0110335
gene-APOBR	0.953049	0.0208806
gene-APOD	0.617002	-0.0652847
gene-APOE	0.179509	-0.173648
gene-APOLD1	0.431598	0.221213
gene-APOM	0.885897	-0.0426467
gene-APOO	0.778885	0.0506256
gene-APOOL	0.432107	0.133784
gene-APPBP2	0.987651	0.00173374
gene-APPL1	0.54803	0.0703898
gene-APPL2	0.877015	0.0177423
gene-APRT	0.742029	-0.0691406
gene-APTX	0.450956	-0.145252
gene-AQP1	0.763583	-0.0381704
gene-AQP11	0.930645	-0.0406975
gene-AQP3	0.671634	0.0476687
gene-AQP4	0.667348	-0.236876
gene-AQP8	0.0923552	-0.74546
gene-AQP9	0.100258	0.275412
gene-AQR	0.487626	0.0843519
gene-AR	0.872149	0.0386709
gene-ARAF	0.541538	-0.07171
gene-ARAP1	0.99692	-0.000639544
gene-ARAP2	0.967227	-0.00483629
gene-ARAP3	0.478245	0.110943
gene-ARC	0.408579	-0.229677
gene-ARCN1	0.63685	-0.0523696
gene-AREG	0.403239	-0.191064
gene-AREL1	0.623713	-0.0563384
gene-ARF1	0.800624	-0.0277361
gene-ARF3	0.273377	-0.122431
gene-ARF4	0.467491	-0.0792001
gene-ARF5	0.729929	-0.041798
gene-ARF6	0.915882	-0.011441
gene-ARFGAP2	0.739169	0.0351387
gene-ARFGAP3	0.162268	-0.217185
gene-ARFGEF1	0.731112	0.0363022
gene-ARFGEF2	0.760605	-0.0331381
gene-ARFGEF3	0.405972	-0.131316
gene-ARFIP1	0.611451	-0.0553636
gene-ARFIP2	0.512229	-0.081841
gene-ARFRP1	0.485061	0.0803573
gene-ARG2	0.686955	0.114698
gene-ARGLU1	0.0564883	0.227338
gene-ARHGAP1	0.825588	-0.0238825
gene-ARHGAP10	0.973182	-0.0038035
gene-ARHGAP11A	0.579453	-0.0672047
gene-ARHGAP12	0.126684	0.166477
gene-ARHGAP15	0.127676	-0.543783
gene-ARHGAP17	0.907426	0.0127652
gene-ARHGAP18	0.0627305	-0.239336
gene-ARHGAP19	0.868865	-0.0217238
gene-ARHGAP20	0.603583	-0.144823
gene-ARHGAP21	0.250721	0.130884
gene-ARHGAP22	0.493008	0.248535
gene-ARHGAP23	0.388493	0.101705
gene-ARHGAP24	0.327236	-0.137765
gene-ARHGAP25	0.986699	0.00450254
gene-ARHGAP26	0.419935	0.121109
gene-ARHGAP27	0.667902	-0.0521187
gene-ARHGAP28	0.414503	0.114234
gene-ARHGAP29	0.607762	0.0603781
gene-ARHGAP30	0.442965	0.150253
gene-ARHGAP31	0.821895	-0.0314974
gene-ARHGAP32	0.526598	-0.0839268
gene-ARHGAP33	0.413532	0.245273
gene-ARHGAP35	0.531285	0.0682926
gene-ARHGAP39	0.343008	0.112219
gene-ARHGAP4	0.518908	0.164124
gene-ARHGAP42	0.825743	0.0289649
gene-ARHGAP44	0.0739656	0.565899
gene-ARHGAP45	0.938905	-0.0177088
gene-ARHGAP5	0.916018	-0.0115155
gene-ARHGAP6	0.843523	0.042295
gene-ARHGAP8	0.193343	-0.356676
gene-ARHGAP9	0.435816	0.262603
gene-ARHGDIA	0.615605	-0.0537937
gene-ARHGDIB	0.445352	-0.19478
gene-ARHGEF1	0.442336	0.0826145
gene-ARHGEF10	0.842944	0.022801
gene-ARHGEF10L	0.305526	0.126725
gene-ARHGEF11	0.453588	0.0888511
gene-ARHGEF12	0.506692	0.0734117
gene-ARHGEF15	0.600761	0.0911142
gene-ARHGEF16	0.676522	-0.0845132
gene-ARHGEF17	0.2593	0.136319
gene-ARHGEF18	0.691733	-0.0463037
gene-ARHGEF19	0.2195	0.160861
gene-ARHGEF2	0.671324	0.0528556
gene-ARHGEF25	0.694319	0.0710492
gene-ARHGEF26	0.8824	-0.0194546
gene-ARHGEF28	0.405938	0.109674
gene-ARHGEF3	0.996862	-0.00103502
gene-ARHGEF33	0.557789	0.213623
gene-ARHGEF37	0.444525	0.092654
gene-ARHGEF38	0.53427	0.238447
gene-ARHGEF39	0.813905	0.0501186
gene-ARHGEF4	0.0501405	-0.351833
gene-ARHGEF40	0.352892	0.111949
gene-ARHGEF5	0.115874	0.182407
gene-ARHGEF6	0.500639	0.127502
gene-ARHGEF7	0.248475	0.126088
gene-ARHGEF9	0.504291	0.137559
gene-ARID1A	0.531208	0.0695284
gene-ARID1B	0.698602	0.0430958
gene-ARID2	0.49492	0.07459
gene-ARID3A	0.367964	0.132724
gene-ARID3B	0.93337	-0.0245484
gene-ARID4A	0.968954	0.00481263
gene-ARID4B	0.80299	0.0267945
gene-ARID5A	0.756263	-0.11708
gene-ARID5B	0.865059	0.0186376
gene-ARIH1	0.923742	0.0104516
gene-ARIH2	0.914146	-0.012937
gene-ARL1	0.49784	-0.0736698
gene-ARL10	0.84792	0.0421521
gene-ARL11	0.074015	0.676393
gene-ARL13B	0.907437	-0.0227188
gene-ARL14EPL	0.676573	0.211444
gene-ARL15	0.591973	-0.0594902
gene-ARL16	0.579074	0.090248
gene-ARL2	0.577243	-0.085176
gene-ARL2BP	0.299043	-0.138752
gene-ARL3	0.823257	-0.026883
gene-ARL4A	0.352704	-0.133204
gene-ARL4C	0.203027	0.281409
gene-ARL4D	0.761455	0.0583393
gene-ARL5A	0.718691	0.0382527
gene-ARL5B	0.475921	-0.0824101
gene-ARL6	0.880468	0.0324891
gene-ARL6IP1	0.924244	-0.0112608
gene-ARL6IP4	0.595451	-0.0783299
gene-ARL6IP5	0.457921	-0.0987564
gene-ARL6IP6	0.0828553	-0.207101
gene-ARL8A	0.511495	0.12243
gene-ARL8B	0.387362	-0.0962183
gene-ARMC1	0.267325	-0.125644
gene-ARMC10	0.833699	-0.027547
gene-ARMC12	0.152893	0.518535
gene-ARMC2	0.68121	-0.116838
gene-ARMC5	0.964775	0.00779702
gene-ARMC6	0.817563	-0.0363283
gene-ARMC7	0.56665	0.0893116
gene-ARMC8	0.0797291	0.200556
gene-ARMC9	0.97814	-0.00774304
gene-ARMCX1	0.395417	-0.122122
gene-ARMCX2	0.509526	-0.096679
gene-ARMCX3	0.192962	-0.145243
gene-ARMCX4	0.548208	0.193488
gene-ARMCX5	0.824381	0.0462596
gene-ARMH1	0.941999	-0.0388358
gene-ARMH3	0.551962	-0.0757163
gene-ARMH4	0.089077	-0.252774
gene-ARMT1	0.995163	-0.00149351
gene-ARNT	0.95346	0.0064379
gene-ARNT2	0.865486	-0.0448143
gene-ARNTL	0.0490679	-0.257797
gene-ARNTL2	0.498717	0.212737
gene-ARPC1A	0.694087	-0.0414269
gene-ARPC1B	0.137808	-0.217101
gene-ARPC2	0.324763	-0.109882
gene-ARPC3	0.750551	-0.0333343
gene-ARPC4	0.367194	-0.0953848
gene-ARPC5	0.316416	-0.124754
gene-ARPC5L	0.932357	-0.0126737
gene-ARPIN	0.684121	-0.052284
gene-ARPP19	0.928825	-0.00965327
gene-ARRB1	0.899975	0.0180964
gene-ARRB2	0.734751	0.0799645
gene-ARRDC1	0.3426	0.118785
gene-ARRDC2	0.738953	-0.0460531
gene-ARRDC3	0.429817	-0.0882494
gene-ARRDC4	0.33005	0.117789
gene-ARSA	0.425004	-0.145564
gene-ARSB	0.0313358	-0.348891
gene-ARSD	0.369465	0.285351
gene-ARSG	0.922791	0.0169607
gene-ARSH	0.243254	-0.220285
gene-ARSI	0.927328	-0.0328815
gene-ARSJ	0.570973	-0.103367
gene-ARSK	0.203638	-0.354899
gene-ARSL	0.0764885	-0.526193
gene-ART3	0.139112	-0.659192
gene-ARV1	0.696807	0.0607932
gene-ARVCF	0.118466	0.42538
gene-AS3MT	0.504375	0.173518
gene-ASAH1	0.196902	0.199713
gene-ASAH2	0.305802	0.255408
gene-ASAP1	0.630809	0.0767718
gene-ASAP2	0.848599	0.023261
gene-ASAP3	0.337115	0.174391
gene-ASB1	0.775382	0.0301183
gene-ASB11	0.452867	0.222377
gene-ASB13	0.316308	-0.135268
gene-ASB2	0.540054	-0.200619
gene-ASB3	0.579795	0.0699164
gene-ASB4	0.738043	0.14403
gene-ASB6	0.568404	-0.0727975
gene-ASB7	0.532339	0.0746114
gene-ASB8	0.335169	0.132737
gene-ASB9	0.767675	-0.0886925
gene-ASCC1	0.964676	-0.00662398
gene-ASCC2	0.890518	-0.0157061
gene-ASCC3	0.765344	-0.0381935
gene-ASCL2	1	0.000217338
gene-ASCL4	0.88822	-0.0529544
gene-ASDURF	0.489612	-0.206803
gene-ASF1A	0.489206	-0.1048
gene-ASF1B	0.361447	-0.132966
gene-ASH1L	0.698817	0.0435722
gene-ASH2L	0.627305	0.0531316
gene-ASIC4	0.154292	0.40587
gene-ASIP	0.0338962	-0.363919
gene-ASL	0.403404	-0.113121
gene-ASMT	0.469944	-0.337135
gene-ASMTL	0.749197	0.0473565
gene-ASNS	0.675646	-0.0775327
gene-ASNSD1	0.471658	-0.101996
gene-ASPA	0.43975	-0.203432
gene-ASPG	0.0379123	0.559109
gene-ASPH	0.837829	0.0267208
gene-ASPHD2	0.933601	-0.0302425
gene-ASPM	0.774444	-0.032791
gene-ASPN	0.761438	0.0747116
gene-ASPRV1	0.280786	0.143429
gene-ASPSCR1	0.995158	-0.000864788
gene-ASRGL1	0.869731	0.0392579
gene-ASS1	0.683402	-0.102611
gene-ASTE1	0.65247	-0.0721648
gene-ASTN2	0.252907	-0.249178
gene-ASXL1	0.0983726	0.173718
gene-ASXL2	0.742119	0.0358948
gene-ATAD1	0.591416	0.0577369
gene-ATAD2	0.469773	0.0819138
gene-ATAD2B	0.60184	0.070572
gene-ATAD5	0.650581	0.0634339
gene-ATAT1	0.096819	0.320928
gene-ATE1	0.31802	0.11614
gene-ATF1	0.845604	-0.0253608
gene-ATF2	0.784832	0.0334795
gene-ATF3	0.798647	0.0539324
gene-ATF4	0.734452	-0.0425284
gene-ATF5	0.700196	-0.059019
gene-ATF6	0.960432	-0.00543726
gene-ATF6B	0.865605	0.019823
gene-ATG10	0.74494	-0.0864035
gene-ATG101	0.780282	-0.0397113
gene-ATG12	0.431862	-0.0907877
gene-ATG13	0.59799	0.0563891
gene-ATG14	0.795206	-0.03775
gene-ATG16L1	0.533119	0.0717241
gene-ATG16L2	0.694264	0.0904325
gene-ATG2A	0.0654955	0.23312
gene-ATG2B	0.235002	-0.128921
gene-ATG3	0.67396	0.0468982
gene-ATG4A	0.0880234	-0.24783
gene-ATG4B	0.316842	-0.123447
gene-ATG4C	0.185824	0.181132
gene-ATG4D	0.131889	0.180785
gene-ATG5	0.568668	-0.0689994
gene-ATG7	0.357264	-0.122149
gene-ATG9A	1	-0.00019078
gene-ATG9B	0.0197481	0.386536
gene-ATIC	0.662485	-0.0488917
gene-ATL1	0.356872	-0.257306
gene-ATL2	0.948895	0.0078132
gene-ATL3	0.687166	0.0429533
gene-ATM	0.82271	-0.0255037
gene-ATMIN	0.555527	0.0783195
gene-ATN1	0.595123	0.0589601
gene-ATOH8	0.251357	0.247634
gene-ATOX1	0.556588	-0.0754189
gene-ATP10A	0.389095	-0.116919
gene-ATP10B	0.830794	0.0598977
gene-ATP10D	0.0754664	-0.207063
gene-ATP11A	0.264014	0.120854
gene-ATP11B	0.778459	0.0312225
gene-ATP11C	0.26932	0.14675
gene-ATP12A	0.114084	0.545401
gene-ATP13A1	0.429149	-0.0865103
gene-ATP13A2	0.366776	-0.122221
gene-ATP13A3	0.608171	-0.0565404
gene-ATP13A4	0.718261	0.0605277
gene-ATP13A5	0.646972	0.117304
gene-ATP1A1	0.0501202	-0.22333
gene-ATP1A2	0.454032	0.244874
gene-ATP1B1	0.456147	0.100103
gene-ATP1B2	0.69622	-0.0573776
gene-ATP1B3	0.00166153	-0.407139
gene-ATP23	0.10076	-0.312178
gene-ATP2A2	0.926153	-0.0107298
gene-ATP2A3	0.919864	0.0194315
gene-ATP2B1	0.727469	-0.0370568
gene-ATP2B2	0.00898486	-0.391739
gene-ATP2B3	0.413597	-0.355762
gene-ATP2C1	0.937062	0.00848418
gene-ATP2C2	0.154623	0.234359
gene-ATP4A	0.495364	-0.247615
gene-ATP5F1A	0.274477	-0.120585
gene-ATP5F1B	0.521248	-0.0697642
gene-ATP5F1C	0.59291	-0.0576222
gene-ATP5F1D	0.302935	-0.109553
gene-ATP5F1E	0.940533	-0.00929756
gene-ATP5IF1	0.696421	-0.0554802
gene-ATP5MC1	0.524647	-0.0824812
gene-ATP5MC2	0.36278	-0.0964865
gene-ATP5MC3	0.649316	-0.0509397
gene-ATP5ME	0.584578	0.113693
gene-ATP5MF	0.606008	-0.0798006
gene-ATP5MG	0.917956	-0.0117139
gene-ATP5MK	0.700396	0.0781585
gene-ATP5PB	0.449856	-0.100164
gene-ATP5PD	0.439094	-0.081565
gene-ATP5PF	0.858659	-0.0228381
gene-ATP5PO	0.415323	-0.0892413
gene-ATP6AP1	0.48159	-0.0737214
gene-ATP6AP2	0.77908	0.030404
gene-ATP6V0A1	0.81436	-0.0247806
gene-ATP6V0A2	0.722553	-0.0406238
gene-ATP6V0A4	0.455934	0.169557
gene-ATP6V0B	0.832345	0.0217046
gene-ATP6V0C	0.208216	-0.132904
gene-ATP6V0D1	0.250612	-0.121942
gene-ATP6V0D2	0.0489886	0.827811
gene-ATP6V0E1	0.797459	0.0286786
gene-ATP6V0E2	0.861792	0.0274134
gene-ATP6V1A	0.524561	-0.0666023
gene-ATP6V1B1	0.974445	-0.00522864
gene-ATP6V1B2	0.749782	-0.0340369
gene-ATP6V1C1	0.196139	-0.140644
gene-ATP6V1C2	0.00802187	0.483866
gene-ATP6V1D	0.104963	-0.170243
gene-ATP6V1E1	0.185354	-0.141508
gene-ATP6V1F	0.804508	-0.0309742
gene-ATP6V1G1	0.948665	0.00740043
gene-ATP6V1H	0.241778	-0.122515
gene-ATP7A	0.576858	-0.0681582
gene-ATP7B	0.794954	0.0859778
gene-ATP8A1	0.013533	0.345715
gene-ATP8B1	0.596464	-0.0602283
gene-ATP8B2	0.359429	0.100904
gene-ATP8B3	0.871722	0.0568012
gene-ATP8B4	0.678374	0.0913362
gene-ATP9A	0.812974	0.0262769
gene-ATP9B	0.00778813	0.293994
gene-ATPAF1	0.721694	0.0407141
gene-ATPAF2	0.657097	-0.0804759
gene-ATPSCKMT	0.368639	-0.156455
gene-ATR	0.717379	-0.0460003
gene-ATRAID	0.356492	-0.122505
gene-ATRN	0.769508	0.0316199
gene-ATRNL1	0.749689	-0.0709318
gene-ATRX	0.641625	0.0509823
gene-ATXN1	0.937938	0.0101457
gene-ATXN10	0.553302	-0.0666967
gene-ATXN1L	0.440112	0.0897068
gene-ATXN2	0.702058	0.0432113
gene-ATXN2L	0.448771	0.0872685
gene-ATXN3	0.647186	0.0511686
gene-ATXN7	0.532257	0.075708
gene-ATXN7L1	0.972937	-0.00599258
gene-ATXN7L2	0.837762	0.05748
gene-ATXN7L3	0.933236	0.00925325
gene-ATXN7L3B	0.858057	0.0230691
gene-AUH	0.778785	0.0438374
gene-AUP1	0.628203	-0.049673
gene-AURKA	0.729009	-0.0695877
gene-AURKAIP1	0.476433	-0.108187
gene-AURKB	0.741403	-0.0481711
gene-AUTS2	0.837668	0.0383228
gene-AVEN	0.483929	-0.109176
gene-AVIL	0.796059	0.0867631
gene-AVL9	0.305626	0.1185
gene-AVPI1	0.366195	-0.186684
gene-AVPR1A	0.974069	-0.0147556
gene-AVPR2	0.614826	0.179122
gene-AWAT1	0.00119384	0.682227
gene-AWAT2	0.683786	0.178638
gene-AXIN1	0.699937	0.0457957
gene-AXIN2	0.946604	0.00782144
gene-AXL	0.620222	0.0557765
gene-AZGP1	0.0262323	0.836283
gene-AZI2	0.877343	0.0181329
gene-AZIN1	0.271952	-0.123367
gene-AZIN2	0.548946	-0.229325
gene-B2M	0.977707	-0.00547858
gene-B3GALNT1	0.280645	-0.400893
gene-B3GALNT2	0.784664	-0.0294742
gene-B3GALT2	0.423271	-0.246278
gene-B3GALT4	0.330012	0.189906
gene-B3GALT6	0.874293	0.0279991
gene-B3GAT1	0.2336	0.378336
gene-B3GAT3	0.829555	0.0338745
gene-B3GLCT	0.427152	-0.132854
gene-B3GNT2	0.456166	-0.084342
gene-B3GNT3	0.44325	0.313885
gene-B3GNT5	0.619909	-0.0809054
gene-B3GNT7	0.653603	-0.166888
gene-B3GNT8	0.484356	0.137364
gene-B3GNT9	0.667908	-0.0990252
gene-B3GNTL1	0.264258	0.190606
gene-B4GALNT1	0.391975	-0.29348
gene-B4GALNT3	0.549303	0.0781915
gene-B4GALNT4	0.383475	0.0983214
gene-B4GALT1	0.470198	-0.0791407
gene-B4GALT2	0.784933	0.0297664
gene-B4GALT3	0.946849	0.0101168
gene-B4GALT4	0.675859	-0.0890529
gene-B4GALT5	0.44195	-0.144518
gene-B4GALT6	0.347357	0.250572
gene-B4GALT7	0.711458	-0.0628485
gene-B4GAT1	0.641198	-0.0760812
gene-B9D1	0.462483	-0.139875
gene-B9D2	0.749988	-0.0910343
gene-BAALC	0.501882	-0.265424
gene-BABAM1	0.710974	0.0531749
gene-BABAM2	0.531065	-0.0783882
gene-BACE1	0.115192	-0.238988
gene-BACE2	0.54178	-0.136433
gene-BACH1	0.989943	0.00163941
gene-BACH2	0.423731	0.108104
gene-BAD	0.598821	0.0909246
gene-BAG1	0.88986	0.0151236
gene-BAG2	0.919029	0.0145236
gene-BAG3	0.097178	-0.172814
gene-BAG4	0.91666	0.0126232
gene-BAG5	0.785729	0.0321673
gene-BAG6	0.906523	0.0129335
gene-BAHCC1	0.630666	0.064015
gene-BAHD1	0.532894	0.0731293
gene-BAIAP2	0.110117	0.194009
gene-BAIAP2L1	0.296901	-0.117274
gene-BAK1	0.851091	-0.026093
gene-BAMBI	0.710072	-0.0512388
gene-BANF1	0.616643	-0.0535979
gene-BANK1	0.21	-0.460912
gene-BAP1	0.562046	-0.0602636
gene-BARD1	0.633984	-0.102329
gene-BARX2	0.467526	0.0849157
gene-BASP1	0.943977	-0.0140907
gene-BATF3	1	0.00436365
gene-BAX	0.693255	-0.0722936
gene-BAZ1A	0.747422	-0.0422105
gene-BAZ1B	0.587312	-0.0570008
gene-BAZ2A	0.382588	0.103102
gene-BAZ2B	0.275063	0.118611
gene-BBC3	0.0636375	0.531303
gene-BBIP1	0.976199	-0.00652129
gene-BBLN	0.525461	0.0742008
gene-BBOX1	0.12448	-0.367455
gene-BBS1	0.0154061	0.345474
gene-BBS10	0.248779	0.278789
gene-BBS12	0.79362	-0.0546544
gene-BBS2	0.872346	-0.0258281
gene-BBS4	0.986695	0.00224577
gene-BBS5	0.533166	-0.134978
gene-BBS7	0.817066	-0.0448428
gene-BBS9	0.566326	-0.102739
gene-BBX	0.842464	0.0209773
gene-BCAM	0.786384	0.0296215
gene-BCAP29	0.696497	-0.0640123
gene-BCAP31	0.248059	-0.121196
gene-BCAR1	0.927725	0.0125643
gene-BCAR3	0.520812	-0.100342
gene-BCAS1	0.549339	0.118295
gene-BCAS2	0.181743	-0.16726
gene-BCAS3	0.382325	-0.130747
gene-BCAS4	0.601278	-0.125921
gene-BCAT1	0.806173	-0.147972
gene-BCAT2	0.00281192	0.420509
gene-BCDIN3D	0.281406	-0.236362
gene-BCHE	0.656666	-0.100132
gene-BCKDHA	0.979258	-0.00296709
gene-BCKDHB	0.586562	0.0701118
gene-BCKDK	0.643292	-0.0632627
gene-BCL10	0.54219	-0.095625
gene-BCL11A	0.699812	0.0619291
gene-BCL11B	0.664628	0.0565226
gene-BCL2	0.921939	-0.0121336
gene-BCL2A1	0.611067	-0.18465
gene-BCL2L1	0.453287	-0.0879265
gene-BCL2L11	0.466279	-0.0994351
gene-BCL2L12	0.812593	0.0563564
gene-BCL2L13	0.905882	-0.0126763
gene-BCL2L15	0.674946	-0.157971
gene-BCL3	0.893634	-0.0237489
gene-BCL6	0.502044	0.0894596
gene-BCL6B	0.851426	-0.0461232
gene-BCL7A	0.52775	0.0800939
gene-BCL7B	0.731131	0.0560009
gene-BCL7C	0.619735	0.0598195
gene-BCL9	0.154696	0.191831
gene-BCL9L	0.518994	0.0773601
gene-BCLAF1	0.653787	0.0470696
gene-BCLAF3	0.617449	0.0870718
gene-BCO2	0.760133	0.108463
gene-BCOR	0.461818	0.0873049
gene-BCORL1	0.708966	0.069371
gene-BCR	0.504843	0.0779255
gene-BDH1	0.830263	-0.0270861
gene-BDH2	0.436636	-0.146685
gene-BDKRB2	0.580075	0.188733
gene-BDNF	0.767445	-0.0843602
gene-BDP1	0.437035	0.087745
gene-BECN1	0.945875	0.00736194
gene-BEND3	0.662267	0.0707894
gene-BEND5	0.993816	-0.00369372
gene-BEND7	0.143339	0.345118
gene-BET1	0.483274	-0.0907178
gene-BET1L	0.273731	0.147364
gene-BEX2	0.914106	-0.0177978
gene-BEX3	0.943488	0.018136
gene-BEX4	0.818358	0.0862842
gene-BEX5	0.412691	0.406198
gene-BFAR	0.389531	0.119772
gene-BGN	0.0286614	-0.312388
gene-BHLHA15	0.0266095	-0.671444
gene-BHLHE22	0.776871	0.0443131
gene-BHLHE40	0.181534	0.1672
gene-BHLHE41	0.126736	0.201624
gene-BICC1	0.560693	-0.081721
gene-BICD1	0.737597	0.122593
gene-BICD2	0.329308	0.105036
gene-BICDL1	0.457285	0.161423
gene-BICDL2	0.764228	-0.0335735
gene-BICRA	0.401728	0.130221
gene-BICRAL	0.599007	0.0645924
gene-BID	0.897598	-0.0157869
gene-BIIIB4	0.552191	-0.13646
gene-BIN1	0.251658	-0.169352
gene-BIN2	1	-0.00153089
gene-BIN3	0.647998	-0.0646771
gene-BIRC2	0.626297	0.0515945
gene-BIRC3	0.882881	0.0245763
gene-BIRC5	0.19496	-0.16867
gene-BIRC6	0.963293	-0.00507456
gene-BIVM	0.734593	-0.0432084
gene-BLK	0.662724	0.174229
gene-BLM	0.573881	0.105454
gene-BLMH	0.992443	0.00139614
gene-BLNK	0.462345	-0.22505
gene-BLOC1S1	0.733396	-0.0509454
gene-BLOC1S2	0.859909	0.0262944
gene-BLOC1S3	0.346561	-0.177133
gene-BLOC1S4	0.386658	-0.188443
gene-BLOC1S5	0.207104	-0.170962
gene-BLOC1S6	0.386147	0.0955751
gene-BLVRA	0.763938	0.0349919
gene-BLVRB	0.0623565	-0.277585
gene-BLZF1	0.796283	-0.0277778
gene-BMERB1	0.324562	-0.264676
gene-BMF	0.00965718	0.340574
gene-BMI1	0.601407	-0.0557675
gene-BMP1	0.596987	0.0732732
gene-BMP2	0.778324	-0.0383138
gene-BMP2K	0.956617	0.00602039
gene-BMP3	0.213794	0.219726
gene-BMP4	0.706875	0.0434766
gene-BMP6	0.980185	0.00817153
gene-BMP7	0.992084	-0.00140158
gene-BMP8B	0.948263	0.0119908
gene-BMPER	0.379851	-0.268605
gene-BMPR1A	0.551502	0.0640664
gene-BMPR1B	0.925191	0.0224071
gene-BMPR2	0.61153	0.0578802
gene-BMS1	0.696352	-0.0420253
gene-BMT2	0.86726	-0.0226294
gene-BMX	0.606772	-0.138879
gene-BNC1	0.283233	-0.123942
gene-BNC2	0.889625	0.0166945
gene-BNIP1	0.91897	0.0200179
gene-BNIP2	0.462852	0.0820868
gene-BNIP3	0.620452	0.0539029
gene-BNIP3L	0.417267	0.0892975
gene-BNIPL	0.219894	0.155125
gene-BOC	0.933762	0.0100609
gene-BOD1	0.472578	-0.104601
gene-BOD1L1	0.577862	0.0632948
gene-BOK	0.570723	0.071919
gene-BOLA1	1	-0.00122242
gene-BOLA2B	0.643309	0.0792506
gene-BOLA3	0.965239	0.0110865
gene-BOP1	0.925418	-0.0113372
gene-BORA	0.691158	0.0745729
gene-BORCS5	0.7373	-0.0665277
gene-BORCS6	0.480071	0.109266
gene-BORCS7	0.738676	0.0554444
gene-BORCS8	0.697	-0.0814135
gene-BPGM	0.215182	-0.156448
gene-BPHL	0.679796	0.0596997
gene-BPIFB2	0.0286642	-1.10579
gene-BPIFB6	8.86727e-05	-1.88695
gene-BPIFC	0.731439	-0.0463851
gene-BPNT1	0.448725	-0.0983295
gene-BPNT2	0.470282	-0.0846354
gene-BPTF	0.897102	-0.0139472
gene-BRAF	0.126455	0.230047
gene-BRAT1	0.948985	0.00988656
gene-BRCA1	0.568023	-0.0767026
gene-BRCA2	0.443205	-0.101064
gene-BRCC3	0.409171	-0.101578
gene-BRD1	0.298262	0.111315
gene-BRD2	0.979354	-0.00277183
gene-BRD3	0.509181	0.0707709
gene-BRD3OS	0.682471	-0.108499
gene-BRD4	0.866616	-0.0183634
gene-BRD7	0.872768	-0.0165785
gene-BRD8	0.308951	0.105879
gene-BRD9	0.729624	0.037125
gene-BRF1	0.107219	0.185243
gene-BRF2	0.666114	0.0931192
gene-BRI3	0.858481	0.0250651
gene-BRINP1	0.372548	0.307771
gene-BRIP1	0.71536	-0.0639702
gene-BRIX1	0.315134	-0.120863
gene-BRK1	0.786522	-0.0318395
gene-BRME1	1	-0.00537674
gene-BRMS1	0.685964	0.0520465
gene-BRMS1L	0.752788	-0.046336
gene-BROX	0.559201	0.0681594
gene-BRPF1	0.276762	0.119748
gene-BRPF3	0.275322	0.146012
gene-BRSK2	0.695953	0.145897
gene-BRWD1	0.274671	0.121353
gene-BRWD3	0.864731	-0.018973
gene-BSCL2	0.914899	0.0158145
gene-BSDC1	0.90607	-0.0134681
gene-BSG	0.173213	-0.172779
gene-BSN	0.433011	-0.262252
gene-BSPRY	0.430593	-0.187003
gene-BST-2A	0.704689	-0.178539
gene-BST-2B	0.91695	-0.0361168
gene-BTAF1	0.0653529	-0.211845
gene-BTBD1	0.290889	-0.119156
gene-BTBD10	0.485515	-0.101977
gene-BTBD11	0.499808	-0.101615
gene-BTBD18	0.363899	0.323325
gene-BTBD19	0.773146	0.0825124
gene-BTBD2	0.970703	-0.00425459
gene-BTBD3	0.943209	-0.0111098
gene-BTBD6	0.598122	-0.0646432
gene-BTBD7	0.860834	0.018598
gene-BTBD8	0.323392	0.160469
gene-BTBD9	0.958205	-0.00656712
gene-BTC	0.321611	-0.230886
gene-BTD	0.695411	0.0631304
gene-BTF3	0.661994	-0.0482581
gene-BTF3L4	0.767922	-0.0370676
gene-BTG1	0.8329	-0.0265186
gene-BTG2	0.677175	-0.0501902
gene-BTG3	0.629503	0.0679833
gene-BTK	0.252934	-0.402652
gene-BTNL9	0.450954	0.329651
gene-BTRC	0.75493	0.0352739
gene-BUB1	0.743177	-0.0391381
gene-BUB1B	0.904591	0.0140055
gene-BUB3	0.869304	0.0181507
gene-BUD13	0.898369	0.0215106
gene-BUD23	0.202169	0.165067
gene-BUD31	0.978736	-0.0033759
gene-BYSL	0.69682	-0.044608
gene-BZW1	0.871009	-0.0176925
gene-BZW2	0.272408	-0.115969
gene-C11H17orf100	0.709732	0.121693
gene-C11H17orf107	0.745728	-0.0801993
gene-C11H17orf113	0.111578	-0.643208
gene-C11H17orf49	0.750177	0.0412173
gene-C11H17orf58	0.608091	-0.141478
gene-C11H17orf67	0.554273	0.709481
gene-C11H17orf75	0.828028	-0.0287208
gene-C11H17orf80	0.06771	0.25444
gene-C12H1orf112	0.810982	-0.0382325
gene-C12H1orf115	0.600713	0.0854768
gene-C12H1orf116	0.278527	-0.129293
gene-C12H1orf159	0.549646	0.107129
gene-C12H1orf167	0.322696	0.291906
gene-C12H1orf174	0.475991	-0.111597
gene-C12H1orf21	0.0370782	-0.237705
gene-C12H1orf53	0.976291	0.0101431
gene-C12H1orf74	0.992779	-0.00491708
gene-C13H20orf27	0.475464	-0.0990852
gene-C14H16orf46	0.401114	0.35599
gene-C14H16orf74	0.529797	0.16864
gene-C14H16orf87	0.86679	0.0393827
gene-C14H19orf12	0.875993	-0.0263468
gene-C14H19orf47	0.663707	0.0605931
gene-C14H19orf54	0.692938	0.0879973
gene-C15H11orf1	0.956337	0.0264133
gene-C15H11orf49	0.932738	0.0165303
gene-C15H11orf52	0.882201	-0.0500029
gene-C15H11orf58	0.952205	0.0064311
gene-C15H11orf71	0.539979	-0.171207
gene-C15H11orf96	0.697477	0.0563046
gene-C16H5orf22	0.560712	0.0811869
gene-C16H5orf34	0.699729	0.0730799
gene-C16H5orf51	0.727565	-0.0362865
gene-C17H12orf43	0.831199	-0.0408757
gene-C17H12orf76	0.979374	0.00698815
gene-C17H22orf39	0.902086	0.0197242
gene-C17H4orf33	0.259386	-0.348941
gene-C17H4orf46	0.50819	-0.0840133
gene-C18H14orf132	0.851787	-0.0600988
gene-C18H14orf28	0.320109	0.213705
gene-C18H15orf39	0.268353	-0.151903
gene-C18H15orf40	0.60112	0.0756001
gene-C19H3orf14	0.299843	-0.375983
gene-C19H3orf18	0.538409	-0.222568
gene-C19H3orf20	0.378307	0.255363
gene-C19H3orf22	0.413919	-0.25486
gene-C19H3orf49	0.0150482	0.871832
gene-C19H3orf62	0.637986	-0.120966
gene-C1D	0.471723	0.102405
gene-C1GALT1	0.193046	-0.210876
gene-C1GALT1C1	0.85335	-0.0287878
gene-C1H1orf109	0.555444	-0.0885773
gene-C1H1orf122	0.630566	-0.104114
gene-C1H1orf210	0.796697	-0.0611128
gene-C1H1orf216	0.474056	-0.143504
gene-C1H1orf226	0.560239	0.091654
gene-C1H1orf43	0.882077	-0.0176291
gene-C1H1orf50	0.504054	0.115584
gene-C1H1orf52	0.832247	-0.0450831
gene-C1H1orf54	0.903984	-0.0431129
gene-C1H1orf68	0.620228	-0.200394
gene-C1H21orf91	0.683323	-0.049302
gene-C1H3orf33	0.556704	0.16712
gene-C1H3orf38	0.824296	-0.0358318
gene-C1H3orf52	0.235163	-0.172706
gene-C1H3orf70	0.957296	-0.0109462
gene-C1QA	0.534239	0.147455
gene-C1QB	0.546179	-0.143112
gene-C1QC	0.948244	-0.0160598
gene-C1QL3	0.175777	1.12841
gene-C1QTNF1	0.167941	-0.197609
gene-C1QTNF12	0.554788	-0.0808095
gene-C1QTNF2	0.7654	-0.0909081
gene-C1QTNF3	0.109383	-0.574854
gene-C1QTNF5	0.63659	-0.136711
gene-C1QTNF6	0.0393469	-0.812104
gene-C1QTNF7	0.853198	0.0507244
gene-C1R	0.535107	-0.112135
gene-C1S	0.776189	-0.0515859
gene-C2	0.338138	-0.29991
gene-C20H6orf132	0.684419	0.0529848
gene-C20H6orf136	0.941146	0.0216152
gene-C20H6orf141	0.869238	0.0396843
gene-C20H6orf15	0.260129	0.383768
gene-C20H6orf226	0.237312	0.273286
gene-C20H6orf47	0.90437	-0.016446
gene-C20H6orf52	0.154207	0.437118
gene-C20H6orf62	0.893679	0.0155244
gene-C20H6orf89	0.525853	0.0662985
gene-C21H11orf24	0.23051	-0.180997
gene-C21H11orf54	0.571159	0.0821726
gene-C21H11orf68	0.885714	-0.0208991
gene-C21H11orf80	0.263297	0.210718
gene-C21H11orf98	0.796826	0.0466012
gene-C22H10orf143	0.910553	-0.034808
gene-C22H10orf88	0.935357	0.0130695
gene-C22H10orf95	0.355988	0.382515
gene-C23H18orf21	0.694053	0.0715526
gene-C23H18orf25	0.736451	-0.0374884
gene-C23H18orf32	0.77768	0.0400176
gene-C23H18orf54	0.753204	0.0660962
gene-C24H16orf54	0.519851	0.288714
gene-C24H16orf72	0.904899	-0.0161877
gene-C24H16orf91	0.850991	0.0263527
gene-C24H7orf26	0.889294	0.0176818
gene-C24H7orf50	0.569822	-0.111179
gene-C25H1orf131	0.24149	-0.214065
gene-C25H1orf198	0.249004	-0.134864
gene-C26H4orf47	0.716145	0.0861963
gene-C26H8orf48	0.925354	-0.0248084
gene-C2CD2	0.845569	0.0224619
gene-C2CD2L	0.0331814	0.274957
gene-C2CD3	0.192841	-0.185799
gene-C2CD5	0.948174	-0.00859944
gene-C2H2orf69	0.707915	-0.0692088
gene-C2H2orf72	0.391987	0.408384
gene-C2H2orf76	0.909927	-0.0291203
gene-C2H2orf88	0.675585	-0.155435
gene-C2H8orf58	2.15354e-05	0.547931
gene-C2H9orf152	0.689273	0.0874106
gene-C2H9orf40	0.713688	0.0710373
gene-C2H9orf43	1	-0.00632643
gene-C2H9orf64	0.349364	-0.234932
gene-C2H9orf85	0.667809	-0.0827511
gene-C3AR1	0.622409	-0.157565
gene-C3H12orf29	0.528465	-0.0905368
gene-C3H12orf4	0.816127	-0.044397
gene-C3H12orf56	0.492078	0.259054
gene-C3H12orf57	0.754679	0.0454745
gene-C3H12orf73	0.737232	0.101798
gene-C3H12orf75	0.829098	0.0499376
gene-C3H22orf23	0.635532	-0.131888
gene-C3H2orf42	1	-0.000870662
gene-C3H2orf49	0.714234	0.0490449
gene-C3H2orf68	0.969358	0.00459707
gene-C3H9orf116	0.292964	0.178956
gene-C3H9orf78	0.81785	0.0289506
gene-C4H7orf25	0.590458	-0.100906
gene-C4H7orf31	0.489835	-0.23865
gene-C4H7orf57	0.818005	-0.0319171
gene-C5AR1	0.417733	-0.311676
gene-C5AR2	0.798201	0.0543048
gene-C5H19orf25	0.812847	0.0381678
gene-C5H19orf44	0.293773	0.212421
gene-C5H19orf53	0.410594	-0.0985396
gene-C5H19orf71	0.671002	0.127642
gene-C5H1orf35	0.628967	0.0781086
gene-C5H5orf15	0.279633	-0.131324
gene-C5H5orf24	0.618291	-0.0527168
gene-C5H5orf46	0.427919	0.285171
gene-C5H5orf63	0.0865602	0.300774
gene-C6H4orf3	0.26426	-0.123157
gene-C7	0.363974	0.406406
gene-C7H14orf119	0.849796	-0.0259774
gene-C7H14orf93	0.703652	-0.0676676
gene-C7H15orf62	0.417653	0.125886
gene-C8H6orf120	0.840007	0.0209629
gene-C9H8orf33	0.603536	0.0723901
gene-C9H8orf76	0.659728	-0.0971835
gene-C9H8orf82	0.942815	-0.0171379
gene-C9H8orf89	0.202674	0.401247
gene-C9orf72	0.802373	-0.0322079
gene-CA11	0.279909	0.436987
gene-CA12	0.314361	0.159112
gene-CA13	0.91801	0.0223626
gene-CA2	0.498926	0.106048
gene-CA4	0.219308	-0.505635
gene-CA5B	0.794283	-0.0568611
gene-CAAP1	0.633244	-0.0685737
gene-CAB39	0.940183	0.00865579
gene-CAB39L	0.822539	-0.0553919
gene-CABCOCO1	0.830563	-0.0480054
gene-CABIN1	0.60801	0.066714
gene-CABLES1	0.878776	0.0249654
gene-CABLES2	0.294756	0.163218
gene-CABYR	0.480003	0.166629
gene-CACFD1	0.263519	-0.193755
gene-CACHD1	0.304395	0.120052
gene-CACNA1A	0.836033	0.077368
gene-CACNA1C	0.483315	0.164955
gene-CACNA1D	0.437794	0.287017
gene-CACNA1G	0.699787	-0.128056
gene-CACNA1H	0.604828	0.0695708
gene-CACNA1S	0.0011137	1.67016
gene-CACNA2D1	0.736634	0.060553
gene-CACNA2D2	0.211294	-0.435482
gene-CACNA2D3	0.806297	0.0824983
gene-CACNB1	0.410148	0.18586
gene-CACNB2	0.73194	-0.096299
gene-CACNB3	0.37055	0.118698
gene-CACNB4	0.105419	0.455729
gene-CACNG4	0.299333	0.32966
gene-CACNG5	0.184736	-0.44015
gene-CACTIN	0.894752	-0.0151074
gene-CACUL1	0.753249	-0.0341497
gene-CAD	0.562111	0.0706363
gene-CADM1	0.950988	-0.00690167
gene-CADM3	0.452403	-0.181375
gene-CADM4	0.178299	0.305437
gene-CADPS2	0.210849	-0.246492
gene-CAGE1	0.457522	0.308974
gene-CALCOCO1	0.604734	0.0583956
gene-CALCOCO2	0.678201	0.045384
gene-CALCRL	0.485353	0.115314
gene-CALD1	0.671246	-0.0475714
gene-CALHM2	0.882244	0.0250137
gene-CALHM4	0.574097	-0.191821
gene-CALHM5	0.722623	0.0441373
gene-CALM1	0.347344	-0.10378
gene-CALM2	0.57119	-0.0622695
gene-CALM3	0.658836	-0.0528395
gene-CALML4	0.356672	0.236866
gene-CALR	0.18666	-0.152129
gene-CALU	0.174992	-0.18867
gene-CAMK1	0.824782	0.061587
gene-CAMK1D	0.666105	0.0570234
gene-CAMK2B	0.823916	0.0699633
gene-CAMK2D	0.472787	0.0842813
gene-CAMK2G	0.913388	-0.0142071
gene-CAMK2N1	0.995773	-0.000995557
gene-CAMK4	0.853302	0.0911297
gene-CAMKK1	0.417597	-0.145252
gene-CAMKK2	0.218281	0.152317
gene-CAMKMT	0.311019	0.302364
gene-CAMLG	0.520996	-0.0887037
gene-CAMSAP1	0.853972	-0.0228269
gene-CAMSAP2	0.550251	0.0643763
gene-CAMSAP3	0.712368	0.0449616
gene-CAMTA1	0.58122	0.109687
gene-CAMTA2	0.188371	0.159904
gene-CAND1	0.809167	-0.0270653
gene-CAND2	0.273654	0.303326
gene-CANT1	0.808177	0.0341262
gene-CANX	0.373443	-0.0968684
gene-CAP1	0.436569	-0.0862135
gene-CAP2	0.177502	-0.386948
gene-CAPG	0.258457	-0.15755
gene-CAPN1	0.910846	-0.0126842
gene-CAPN10	0.540715	0.0804778
gene-CAPN12	0.280128	-0.238409
gene-CAPN15	0.0834235	0.229107
gene-CAPN2	0.629743	-0.0586144
gene-CAPN5	0.299681	-0.178088
gene-CAPN6	0.196359	-0.667454
gene-CAPN7	0.792409	0.0299101
gene-CAPN8	0.66895	0.114674
gene-CAPNS1	0.249798	-0.148509
gene-CAPNS2	0.905356	-0.0166313
gene-CAPRIN1	0.528664	-0.0671065
gene-CAPRIN2	0.983228	-0.00421152
gene-CAPS	0.243517	-0.327228
gene-CAPZA1	0.6068	-0.0561611
gene-CAPZA2	0.651584	-0.0497407
gene-CAPZB	0.24203	-0.128327
gene-CARD10	0.907274	0.0188516
gene-CARD11	0.342985	0.318379
gene-CARD14	0.157908	0.366542
gene-CARD19	0.22523	0.205548
gene-CARD6	0.812568	-0.036453
gene-CARF	0.217152	0.190749
gene-CARHSP1	0.486631	-0.0895031
gene-CARM1	0.900822	-0.013563
gene-CARMIL1	0.187626	0.152447
gene-CARMIL2	0.842827	-0.0804106
gene-CARMIL3	0.922561	-0.0290065
gene-CARNMT1	0.696797	-0.0437861
gene-CARS1	0.874381	0.0210907
gene-CARS2	0.881228	0.0203667
gene-CASC3	0.822139	-0.0244326
gene-CASD1	0.784208	-0.0330661
gene-CASK	0.455759	-0.0790565
gene-CASKIN1	0.219868	0.308572
gene-CASKIN2	0.545787	0.0722401
gene-CASP14	0.980098	0.00516838
gene-CASP2	0.770642	-0.0330951
gene-CASP3	0.140481	-0.207347
gene-CASP6	0.587973	-0.0891325
gene-CASP7	0.89506	0.0246459
gene-CASP8	0.465312	-0.130574
gene-CASP8AP2	0.376288	0.100455
gene-CASP9	0.854212	-0.0260899
gene-CASQ2	0.0295072	-0.626111
gene-CASS4	0.836675	-0.070274
gene-CAST	0.835713	-0.0293513
gene-CASTOR1	1	0.000142686
gene-CASTOR2	0.358183	0.117429
gene-CASZ1	0.148551	0.18313
gene-CAT	0.397841	-0.107145
gene-CATSPER2	0.681041	0.14971
gene-CATSPER4	0.00769917	0.820485
gene-CATSPERD	0.945891	-0.0383885
gene-CATSPERG	0.190188	0.490974
gene-CAV1	0.711286	-0.0534901
gene-CAV2	0.948813	0.00794001
gene-CAVIN1	0.487567	-0.0902206
gene-CAVIN2	0.789296	0.0493706
gene-CAVIN3	0.23198	-0.295538
gene-CAVIN4	0.486837	-0.207466
gene-CBFA2T2	0.939067	-0.0105477
gene-CBFA2T3	0.177323	0.203617
gene-CBFB	0.261393	-0.119262
gene-CBL	0.832575	0.0223964
gene-CBLB	0.942148	0.0107608
gene-CBLC	0.845909	0.0511285
gene-CBLL1	0.876792	0.0197565
gene-CBLN3	0.692417	0.145495
gene-CBLN4	0.630228	0.357407
gene-CBR4	0.952433	0.00746494
gene-CBS	0.985666	0.00246047
gene-CBWD1	0.589954	-0.0678839
gene-CBX1	0.547844	-0.0672818
gene-CBX2	0.743642	0.0418816
gene-CBX3	0.973184	-0.00385587
gene-CBX4	0.280844	0.137678
gene-CBX5	0.936937	-0.0086981
gene-CBX6	0.195036	0.188444
gene-CBX7	0.0321385	0.335636
gene-CBX8	0.49166	0.142807
gene-CBY1	0.673883	0.0549421
gene-CC2D1A	0.787828	0.0359603
gene-CC2D1B	0.46706	0.0778981
gene-CC2D2A	0.817516	-0.039277
gene-CC2D2B	0.518721	-0.10253
gene-CCAR1	0.519249	-0.070198
gene-CCAR2	0.402103	0.0940605
gene-CCBE1	0.551677	0.15269
gene-CCDC102A	0.582399	0.082844
gene-CCDC106	0.315042	0.187982
gene-CCDC107	0.857917	0.0393186
gene-CCDC112	0.611662	0.112718
gene-CCDC115	0.748926	-0.0476151
gene-CCDC117	0.407134	-0.100904
gene-CCDC12	0.832799	0.0244482
gene-CCDC120	0.311816	0.117551
gene-CCDC121	0.637873	-0.165976
gene-CCDC124	0.732121	-0.045222
gene-CCDC125	0.264799	0.224674
gene-CCDC126	0.8805	0.0345621
gene-CCDC127	0.964949	0.00833819
gene-CCDC134	0.901777	-0.0234441
gene-CCDC136	0.327119	0.319269
gene-CCDC137	0.404425	-0.128023
gene-CCDC138	0.215065	0.232966
gene-CCDC14	0.195754	0.298736
gene-CCDC141	0.638815	-0.168169
gene-CCDC142	0.0985109	0.324533
gene-CCDC146	0.867539	-0.0732048
gene-CCDC149	0.337888	-0.13847
gene-CCDC15	0.902325	-0.0232772
gene-CCDC150	0.525516	0.243106
gene-CCDC157	0.106063	0.514779
gene-CCDC158	0.449512	-0.151368
gene-CCDC163	0.612636	0.132966
gene-CCDC166	0.710479	0.136673
gene-CCDC167	0.548426	-0.140337
gene-CCDC17	0.0303922	0.630129
gene-CCDC170	0.941119	0.0311106
gene-CCDC171	0.675328	-0.105727
gene-CCDC174	0.95902	-0.00751706
gene-CCDC18	0.778929	0.0585753
gene-CCDC183	0.47872	0.176208
gene-CCDC184	0.112068	0.580153
gene-CCDC186	0.905936	-0.0157992
gene-CCDC187	0.720645	0.0936918
gene-CCDC191	0.852879	-0.0450572
gene-CCDC22	0.661909	0.0641083
gene-CCDC24	0.0835622	0.38699
gene-CCDC25	0.316513	-0.130052
gene-CCDC28A	0.687064	0.0894279
gene-CCDC28B	0.718569	0.0776339
gene-CCDC3	0.774898	-0.0389025
gene-CCDC30	0.78982	0.0741591
gene-CCDC32	0.965238	-0.00687035
gene-CCDC34	0.83799	-0.0426215
gene-CCDC38	0.913931	-0.028888
gene-CCDC40	0.267317	-0.41385
gene-CCDC43	0.972096	-0.00451937
gene-CCDC47	0.879257	-0.0163812
gene-CCDC50	0.852996	-0.0217841
gene-CCDC51	0.336663	-0.181059
gene-CCDC57	0.157079	0.326942
gene-CCDC59	0.688555	0.0832167
gene-CCDC6	0.599311	-0.0548785
gene-CCDC61	0.927383	0.0155547
gene-CCDC62	0.540184	0.153204
gene-CCDC66	0.87699	0.0295667
gene-CCDC68	0.891305	0.0587456
gene-CCDC69	0.874339	0.0594281
gene-CCDC7	0.146555	0.448824
gene-CCDC71	0.598258	-0.0717321
gene-CCDC71L	0.843633	0.024331
gene-CCDC73	0.339153	-0.301983
gene-CCDC77	0.755574	0.0562247
gene-CCDC8	0.156832	0.191403
gene-CCDC80	0.00463032	-0.520468
gene-CCDC82	0.466298	-0.0999143
gene-CCDC85A	0.168586	0.470622
gene-CCDC85C	0.460882	0.0893402
gene-CCDC86	0.587796	-0.0753649
gene-CCDC88A	0.892566	-0.0222757
gene-CCDC88B	0.626488	-0.200198
gene-CCDC88C	0.575661	0.0776503
gene-CCDC89	0.38284	-0.314685
gene-CCDC9	0.630958	0.0631624
gene-CCDC90B	0.36027	0.150559
gene-CCDC91	0.298668	-0.133826
gene-CCDC92	0.928221	0.015826
gene-CCDC93	0.581368	0.0817542
gene-CCDC96	0.943177	0.0196658
gene-CCDC97	0.661928	-0.0493458
gene-CCDC9B	0.329844	0.184447
gene-CCER2	0.879771	0.0597156
gene-CCHCR1	0.457066	0.101827
gene-CCL19	0.970533	0.0198876
gene-CCL21	0.752905	-0.0897055
gene-CCL22	0.258385	-0.908614
gene-CCL24	0.557041	0.226867
gene-CCL25	0.870306	-0.0732525
gene-CCL26	0.300851	0.434336
gene-CCL27	0.975604	0.00860315
gene-CCL5	0.374206	0.448593
gene-CCM2	0.325742	-0.1266
gene-CCM2L	0.696042	0.10958
gene-CCN1	0.225848	0.203367
gene-CCN2	0.711637	0.0495967
gene-CCN3	0.285676	0.16343
gene-CCN4	0.0962074	-0.496603
gene-CCN5	0.366303	0.26861
gene-CCNA2	0.911778	-0.0136461
gene-CCNB1	0.167107	-0.160895
gene-CCNB2	0.224263	-0.187609
gene-CCNB3	0.846085	-0.0294134
gene-CCNC	0.570881	-0.0614512
gene-CCND1	0.86026	-0.0201391
gene-CCND2	0.423869	-0.0880615
gene-CCND3	0.880892	-0.022337
gene-CCNDBP1	0.257218	-0.137467
gene-CCNE1	0.630133	0.122124
gene-CCNE2	0.217054	0.214424
gene-CCNF	0.329828	0.129744
gene-CCNG1	0.984916	0.00250443
gene-CCNG2	0.988971	-0.00248829
gene-CCNH	0.111099	0.240567
gene-CCNI	0.580607	0.0683237
gene-CCNJ	0.111476	-0.260948
gene-CCNJL	0.985256	0.0097139
gene-CCNK	0.891411	0.0187567
gene-CCNL1	0.191064	0.160735
gene-CCNL2	0.0147127	0.26248
gene-CCNQ	0.264374	0.214097
gene-CCNT1	0.898775	0.0144199
gene-CCNT2	0.286351	0.116237
gene-CCNY	0.567291	-0.0606146
gene-CCNYL1	0.379707	-0.109172
gene-CCP110	0.825485	0.0266006
gene-CCPG1	0.836949	-0.0234809
gene-CCR5	0.504729	-0.225483
gene-CCR6	0.986538	0.00972077
gene-CCRL2	0.573572	-0.228217
gene-CCS	0.877388	-0.0224227
gene-CCSER1	0.378125	-0.318844
gene-CCSER2	0.671047	0.050982
gene-CCT2	0.346502	-0.0991048
gene-CCT3	0.250488	-0.124098
gene-CCT4	0.141817	-0.16111
gene-CCT5	0.643954	-0.0492197
gene-CCT6A	0.00698797	-0.44053
gene-CCT7	0.23074	-0.130324
gene-CCT8	0.31966	-0.107068
gene-CD101	0.974206	-0.0116853
gene-CD109	0.316233	0.175797
gene-CD14	0.996964	0.00120292
gene-CD151	0.728713	-0.0413689
gene-CD164	0.950973	-0.00670231
gene-CD164L2	0.859218	-0.0474431
gene-CD1D	0.929449	-0.0169693
gene-CD2	0.48317	0.351324
gene-CD200	0.248136	0.339406
gene-CD207	0.195176	-0.711305
gene-CD22	0.586557	-0.254664
gene-CD24	0.954651	0.00718547
gene-CD244	0.38221	0.345804
gene-CD247	0.879354	0.0413655
gene-CD248	0.733982	-0.0722947
gene-CD274	0.42506	0.288373
gene-CD276	0.399078	-0.128359
gene-CD2BP2	0.917429	0.0136847
gene-CD300E	0.417875	-0.357319
gene-CD300LF	0.691047	-0.17699
gene-CD300LG	0.465869	0.124186
gene-CD320	0.930909	0.0162525
gene-CD34	0.647436	0.057389
gene-CD37	0.953159	-0.0239707
gene-CD3D	0.249748	0.491079
gene-CD3E	0.344335	0.363513
gene-CD3G	0.621161	0.191662
gene-CD4	0.641654	-0.237859
gene-CD40	0.687264	0.141469
gene-CD44	0.0284491	-0.239252
gene-CD46	0.910193	0.0125729
gene-CD47	0.635667	0.0521088
gene-CD5	0.775113	-0.130582
gene-CD52	0.968995	0.0186099
gene-CD53	0.485693	-0.209815
gene-CD55	0.299552	0.139042
gene-CD58	0.314163	-0.118653
gene-CD59	0.743989	-0.0414055
gene-CD6	0.332702	0.286118
gene-CD63	0.139356	-0.194099
gene-CD68	0.564733	-0.135886
gene-CD7	0.903749	0.0530557
gene-CD74	0.694427	-0.112
gene-CD79A	0.44652	-0.321972
gene-CD81	0.746233	-0.0400898
gene-CD82	0.224067	-0.142791
gene-CD83	1	0.000495026
gene-CD84	0.667718	-0.141881
gene-CD86	0.463075	-0.236853
gene-CD8A	0.144629	0.777975
gene-CD8B	0.140086	-0.580761
gene-CD9	0.780816	-0.0307754
gene-CD93	0.247049	-0.218677
gene-CD96	0.834082	0.153472
gene-CD99	0.77895	-0.03699
gene-CD99L2	0.467774	-0.113408
gene-CDADC1	0.901384	0.0157435
gene-CDAN1	0.422198	0.127767
gene-CDC123	0.304428	-0.118578
gene-CDC14A	0.732229	-0.0435713
gene-CDC14B	0.512718	0.0879845
gene-CDC16	0.688892	0.0535321
gene-CDC20	0.267733	-0.147049
gene-CDC23	0.961659	0.00663833
gene-CDC25A	0.945403	-0.0143408
gene-CDC25B	0.626324	-0.070799
gene-CDC25C	0.482499	0.184416
gene-CDC26	0.356778	0.165571
gene-CDC27	0.818108	-0.0255929
gene-CDC34	0.329477	-0.113358
gene-CDC37	0.725434	-0.0372638
gene-CDC37L1	0.573364	0.0725889
gene-CDC40	0.979586	0.00317827
gene-CDC42	0.291067	-0.112275
gene-CDC42BPA	0.654346	0.0472233
gene-CDC42BPB	0.695379	0.0425812
gene-CDC42BPG	0.401369	0.0935781
gene-CDC42EP1	0.381502	0.108992
gene-CDC42EP2	0.762185	0.0688586
gene-CDC42EP3	0.585157	-0.0673861
gene-CDC42EP4	0.677012	-0.0438509
gene-CDC42EP5	0.918571	-0.0276758
gene-CDC42SE1	0.841773	-0.0216417
gene-CDC42SE2	0.805694	-0.0284996
gene-CDC45	0.470131	0.129884
gene-CDC5L	0.310794	-0.110387
gene-CDC6	0.640615	0.0896351
gene-CDC7	0.401889	-0.121016
gene-CDC73	0.964934	-0.00493217
gene-CDCA2	0.772027	-0.0482345
gene-CDCA3	0.594539	-0.0836779
gene-CDCA7	0.615454	-0.0697484
gene-CDCA7L	0.845666	0.0274825
gene-CDCA8	0.727451	-0.0446211
gene-CDCP1	0.772448	0.033617
gene-CDH1	0.951134	-0.00697009
gene-CDH11	0.0494637	-0.233154
gene-CDH13	0.126334	-0.231001
gene-CDH19	0.98621	0.00837098
gene-CDH2	0.0100113	0.702207
gene-CDH23	0.602311	0.0620877
gene-CDH24	0.575207	-0.0852956
gene-CDH3	0.515811	-0.0889993
gene-CDH4	0.271888	0.331109
gene-CDH5	0.585278	-0.0860906
gene-CDH6	0.82518	-0.101204
gene-CDHR2	0.252893	0.255097
gene-CDIN1	0.216899	-0.24405
gene-CDIP1	0.29532	0.197456
gene-CDIPT	0.694885	-0.051903
gene-CDK1	0.668325	-0.0614563
gene-CDK10	0.305893	0.144356
gene-CDK12	0.658686	-0.0539098
gene-CDK13	0.549994	0.0674435
gene-CDK14	0.337712	-0.129166
gene-CDK16	0.459268	0.0857635
gene-CDK17	0.727222	-0.0471046
gene-CDK19	0.543711	0.0727573
gene-CDK2	0.508119	0.0949004
gene-CDK20	0.724373	0.0770926
gene-CDK2AP1	0.270736	-0.125556
gene-CDK2AP2	0.61163	-0.0601639
gene-CDK3	0.00685593	0.978781
gene-CDK4	0.545258	-0.063772
gene-CDK5	0.862273	-0.0258878
gene-CDK5R1	0.243787	0.317153
gene-CDK5RAP1	0.645016	0.0659792
gene-CDK5RAP2	0.514705	0.0791962
gene-CDK5RAP3	0.267537	-0.157475
gene-CDK6	0.966132	-0.00488855
gene-CDK7	0.330097	-0.144871
gene-CDK8	0.499785	-0.0882112
gene-CDK9	0.872902	-0.0166667
gene-CDKAL1	0.626179	-0.0775774
gene-CDKL1	0.268784	0.275871
gene-CDKL2	0.944204	0.0152936
gene-CDKL3	0.462237	0.284819
gene-CDKL4	0.641193	0.134462
gene-CDKL5	0.437751	0.201724
gene-CDKN1A	0.970473	-0.00504736
gene-CDKN1B	0.114873	0.185273
gene-CDKN1C	0.859253	-0.035139
gene-CDKN2AIPNL	0.479541	-0.0765099
gene-CDKN2C	0.725654	-0.0593884
gene-CDKN2D	0.359474	0.228783
gene-CDKN3	0.473903	-0.175832
gene-CDNF	0.0748342	-0.755584
gene-CDO1	0.420567	-0.179133
gene-CDON	0.947286	0.0119627
gene-CDPF1	0.613492	-0.062303
gene-CDR2	0.438761	-0.112584
gene-CDR2L	0.972531	-0.00935919
gene-CDRT1	0.474934	-0.321363
gene-CDS1	0.720978	-0.0498619
gene-CDS2	0.931488	-0.00924392
gene-CDSN	0.510557	-0.0844233
gene-CDT1	0.477097	0.118157
gene-CDV3	0.376039	-0.099676
gene-CDYL	0.579837	-0.0617851
gene-CDYL2	0.156824	-0.283287
gene-CEACAM16	0.403828	0.273721
gene-CEACAM19	0.288509	-0.175324
gene-CEBPA	0.474078	0.0831773
gene-CEBPB	0.679356	0.0518855
gene-CEBPD	0.524146	-0.104742
gene-CEBPG	0.564904	-0.0652562
gene-CEBPZ	0.719602	-0.0385653
gene-CEBPZOS	0.892028	0.0436146
gene-CELF1	0.96559	0.00490442
gene-CELF2	0.940602	-0.0155029
gene-CELF6	0.259491	-0.453489
gene-CELSR1	0.946457	0.00817794
gene-CELSR2	0.720344	0.0454841
gene-CELSR3	0.871564	-0.0696592
gene-CEMIP2	0.334642	-0.123916
gene-CENATAC	0.266772	0.266351
gene-CENPA	0.591168	-0.0739478
gene-CENPB	0.731963	0.0422152
gene-CENPC	0.914087	-0.0147098
gene-CENPE	0.781094	-0.0397258
gene-CENPF	0.947373	-0.00747942
gene-CENPH	0.659016	0.0865666
gene-CENPI	0.503344	-0.101071
gene-CENPJ	0.381529	-0.140545
gene-CENPK	0.804915	-0.0529945
gene-CENPL	0.818869	0.0370011
gene-CENPM	0.490234	0.166295
gene-CENPN	0.801166	0.0470536
gene-CENPO	0.540315	-0.105881
gene-CENPQ	0.957583	-0.0138026
gene-CENPT	0.564368	0.125923
gene-CENPU	0.13547	-0.267169
gene-CENPV	0.885746	-0.035157
gene-CENPW	0.719893	-0.0893991
gene-CENPX	0.5976	0.0934729
gene-CEP104	0.429955	0.0893511
gene-CEP112	0.68065	0.0740769
gene-CEP120	0.918238	-0.0119302
gene-CEP126	0.797073	-0.0817991
gene-CEP128	0.88002	-0.0349236
gene-CEP131	0.819794	0.0388915
gene-CEP135	0.529282	0.117282
gene-CEP152	0.858432	-0.0388738
gene-CEP162	0.222088	-0.227871
gene-CEP164	0.480395	-0.101285
gene-CEP170	0.870405	-0.0277256
gene-CEP170B	0.0675794	0.245456
gene-CEP19	0.210811	-0.194157
gene-CEP192	0.514674	0.0729144
gene-CEP20	0.8144	0.030444
gene-CEP250	0.195483	0.159897
gene-CEP290	0.327663	0.126794
gene-CEP295	0.0652162	0.220031
gene-CEP350	0.975521	0.00346322
gene-CEP41	0.0934639	0.217741
gene-CEP43	0.645484	0.0664538
gene-CEP44	0.693945	-0.0654119
gene-CEP55	0.647438	0.101597
gene-CEP57	0.963088	0.00686624
gene-CEP57L1	0.748917	-0.0582236
gene-CEP63	0.562375	-0.109184
gene-CEP68	0.200328	0.155397
gene-CEP70	0.484486	-0.111099
gene-CEP72	0.020645	0.445502
gene-CEP76	0.523062	-0.0921199
gene-CEP78	0.89899	-0.0198141
gene-CEP83	0.592749	-0.102962
gene-CEP85	0.529093	-0.10342
gene-CEP85L	0.37431	0.208099
gene-CEP89	0.921618	-0.0173946
gene-CEP95	0.441176	0.107833
gene-CEP97	0.744294	0.0519819
gene-CEPT1	0.573266	0.0671115
gene-CERCAM	0.402622	-0.144044
gene-CERK	0.689514	-0.0449922
gene-CERS1	0.731658	0.0806675
gene-CERS2	0.435393	-0.0884456
gene-CERS3	0.178473	-0.23946
gene-CERS4	0.598519	0.0822893
gene-CERS5	0.57956	0.0727502
gene-CERS6	0.233017	-0.236742
gene-CERT1	0.97845	0.00304528
gene-CES2	0.325956	-0.33808
gene-CES3	0.370485	0.256731
gene-CES4A	5.41676e-07	0.723928
gene-CETN2	0.756678	-0.0503339
gene-CETN3	0.487875	0.097109
gene-CFAP126	0.940266	-0.036981
gene-CFAP157	0.0416192	0.583122
gene-CFAP20	0.781379	0.0405868
gene-CFAP20DC	0.716683	0.118562
gene-CFAP251	0.18969	0.559636
gene-CFAP298	0.5982	-0.0690412
gene-CFAP300	0.531773	-0.244661
gene-CFAP36	0.763323	-0.0345923
gene-CFAP410	0.221837	0.197373
gene-CFAP418	0.566035	0.0924697
gene-CFAP45	0.612689	-0.17791
gene-CFAP46	0.212895	0.461204
gene-CFAP54	0.125619	0.472757
gene-CFAP69	0.953474	0.0116933
[truncated: 12,505 more rows]
